# Supplementary material for: Early Growth Response 1 Deficiency Protects the Host against Pseudomonas aeruginosa Lung Infection
Source: PubMed Central journal article supplement (PMC6921661; doi:10.1128/iai.00678-19), 2019-12-17
Supplement: IAI.00678-19-s0001.pdf [file IAI.00678-19-s0001.pdf]

**Fig S1**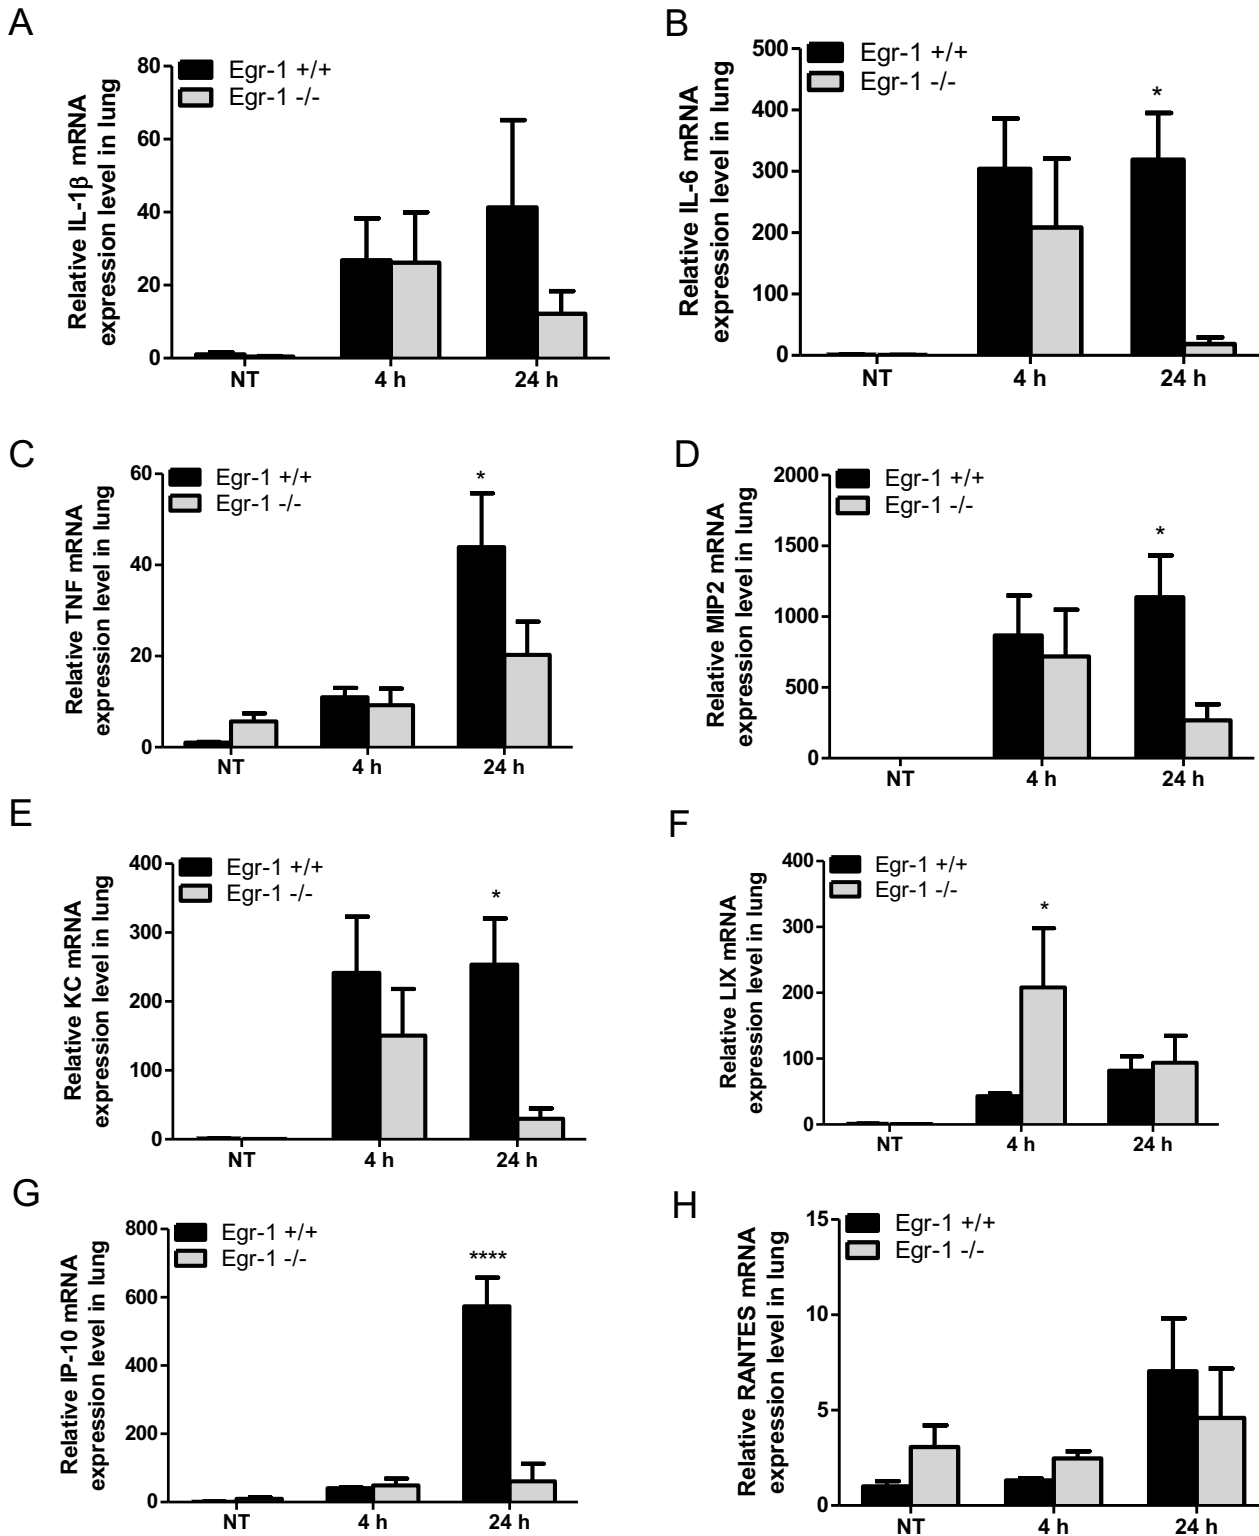

**Fig S1. Egr-1 deficiency impairs proinflammatory cytokine mRNA transcription but has differential effects on chemokine mRNA transcription during *P. aeruginosa* lung infection.** Wild-type (+/+) and Egr-1-deficient (-/-) mice were intranasally infected with  $1 \times 10^9$  CFU/mouse of *P. aeruginosa* 8821 for 4 h, 24 h or an equivalent volume of saline as a control (NT). The total RNA extracted from lungs was reverse transcribed to cDNA and subjected to real-time quantitative PCR for *IL-1 $\beta$*  (A), *IL-6* (B), *TNF* (C), *MIP2* (D), *KC* (E), *LIX* (F), *IP-10* (G) and *RANTES* (H) gene expression. The gene expression was normalized to housekeeping control gene HPRT ( $n = 3 \pm$  SEM, \* $p < 0.05$ ).

**Fig S2**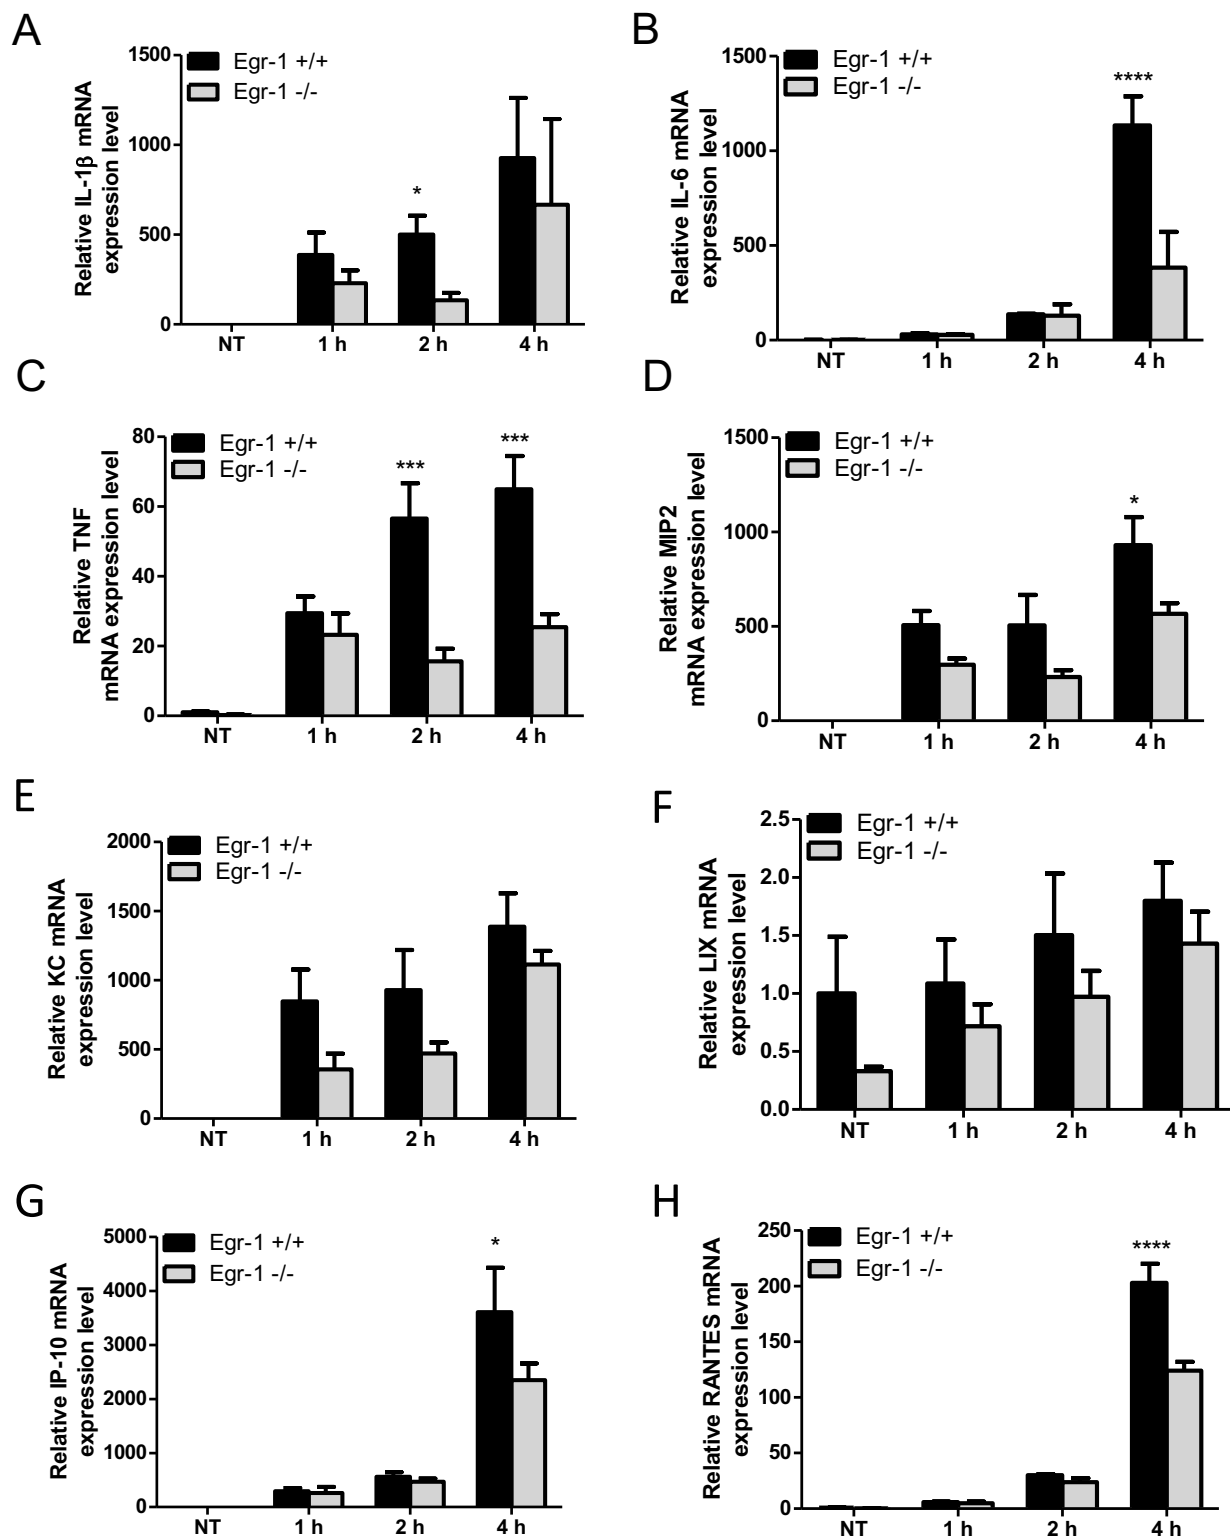

**Fig S2. Egr-1-deficient BMMs display impaired proinflammatory cytokine and chemokine production following *P. aeruginosa* infection.** Wild-type (+/+) and Egr-1-deficient (-/-) BMMs were infected with *P. aeruginosa* 8821 at a MOI of 10 for 1 h, 2 h, 4 h or left untreated (NT). Total RNA isolated from these cells was reverse transcribed to cDNA and subjected to real-time quantitative PCR for *IL-1 $\beta$*  (A), *IL-6* (B), *TNF* (C), *MIP2* (D), *KC* (E), *LIX* (F), *IP-10* (G) and *RANTES* (H) gene expression. The gene expression was normalized to housekeeping control gene HPRT (n = 3  $\pm$  SEM, \*p < 0.05, \*\*\*p < 0.001, \*\*\*\*p < 0.0001).

**Fig S3****PAO1-infected Macrophages**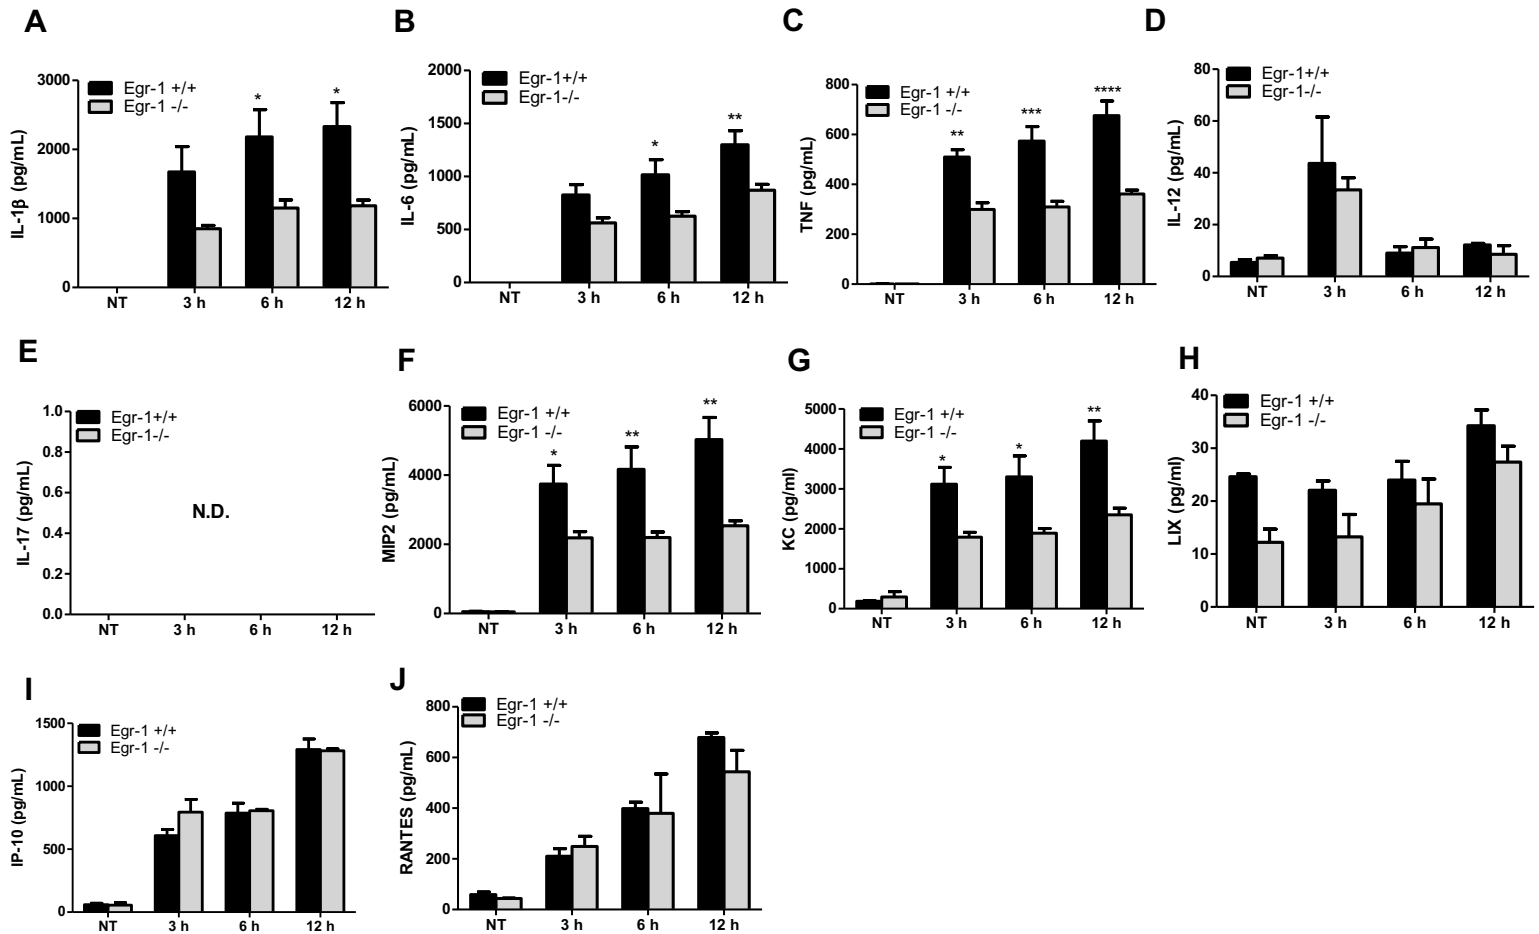

**Fig S3. Egr-1-deficient BMMs display impaired proinflammatory cytokine and chemokine production following *P. aeruginosa* PAO1 infection.** Wild-type (+/+) and Egr-1-deficient (-/-) BMMs were infected with *P. aeruginosa* PAO1 at a MOI of 10 for 3 h, 6 h, 12 h or left untreated (NT). Cell supernatants were collected for the determination of IL-1 $\beta$  (A), IL-6 (B), TNF (C), IL-12 (D), IL-17 (E), MIP2 (F), KC (G), LIX (H), IP-10 (I) and RANTES (J) secretion by ELISA (n = 3  $\pm$  SEM, \*p < 0.05, \*\*p < 0.01, \*\*\*p < 0.001, N.D. = not detected).

**Fig S4****PAO1-infected dendritic cells**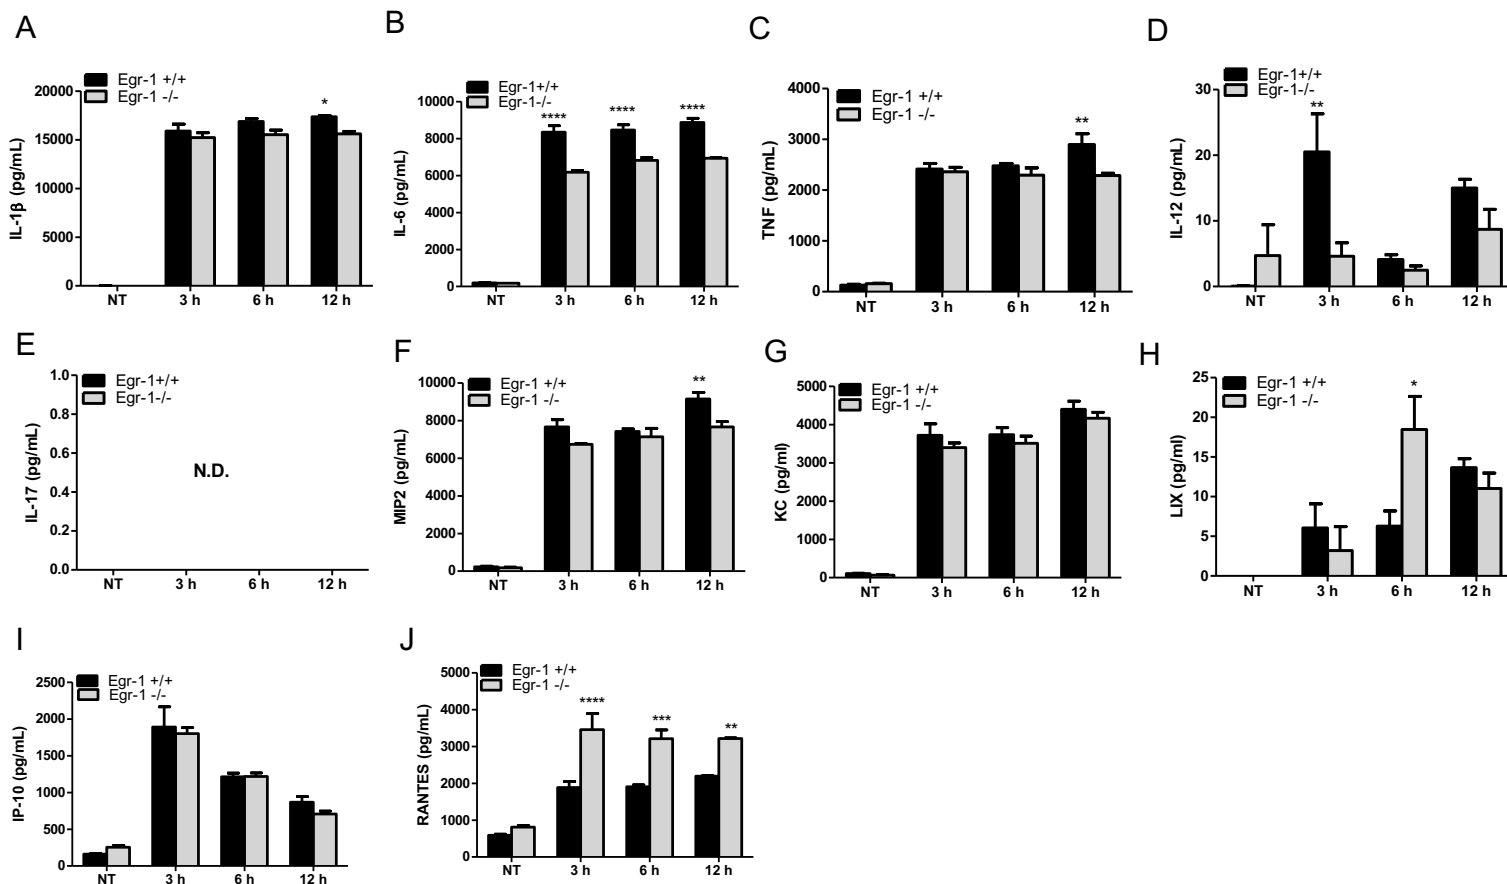

**Fig S4. Egr-1-deficient BMDCs have increased LIX production following *P. aeruginosa* PAO1 infection.** Wild-type (+/+) and Egr-1-deficient (-/-) BMDCs were infected with *P. aeruginosa* PAO1 at a MOI of 10 for 3 h, 6 h, 12 h or left untreated (NT). Cell supernatants were collected for the determination of IL-1 $\beta$  (A), IL-6 (B), TNF (C), IL-12 (D), IL-17 (E), MIP2 (F), KC (G), LIX (H), IP-10 (I) and RANTES (J) secretion by ELISA. (n = 3  $\pm$  SEM, \*p < 0.05, \*\*p < 0.01, \*\*\*p < 0.001, \*\*\*\*p < 0.0001, N.D. = not detected).

**Fig S5**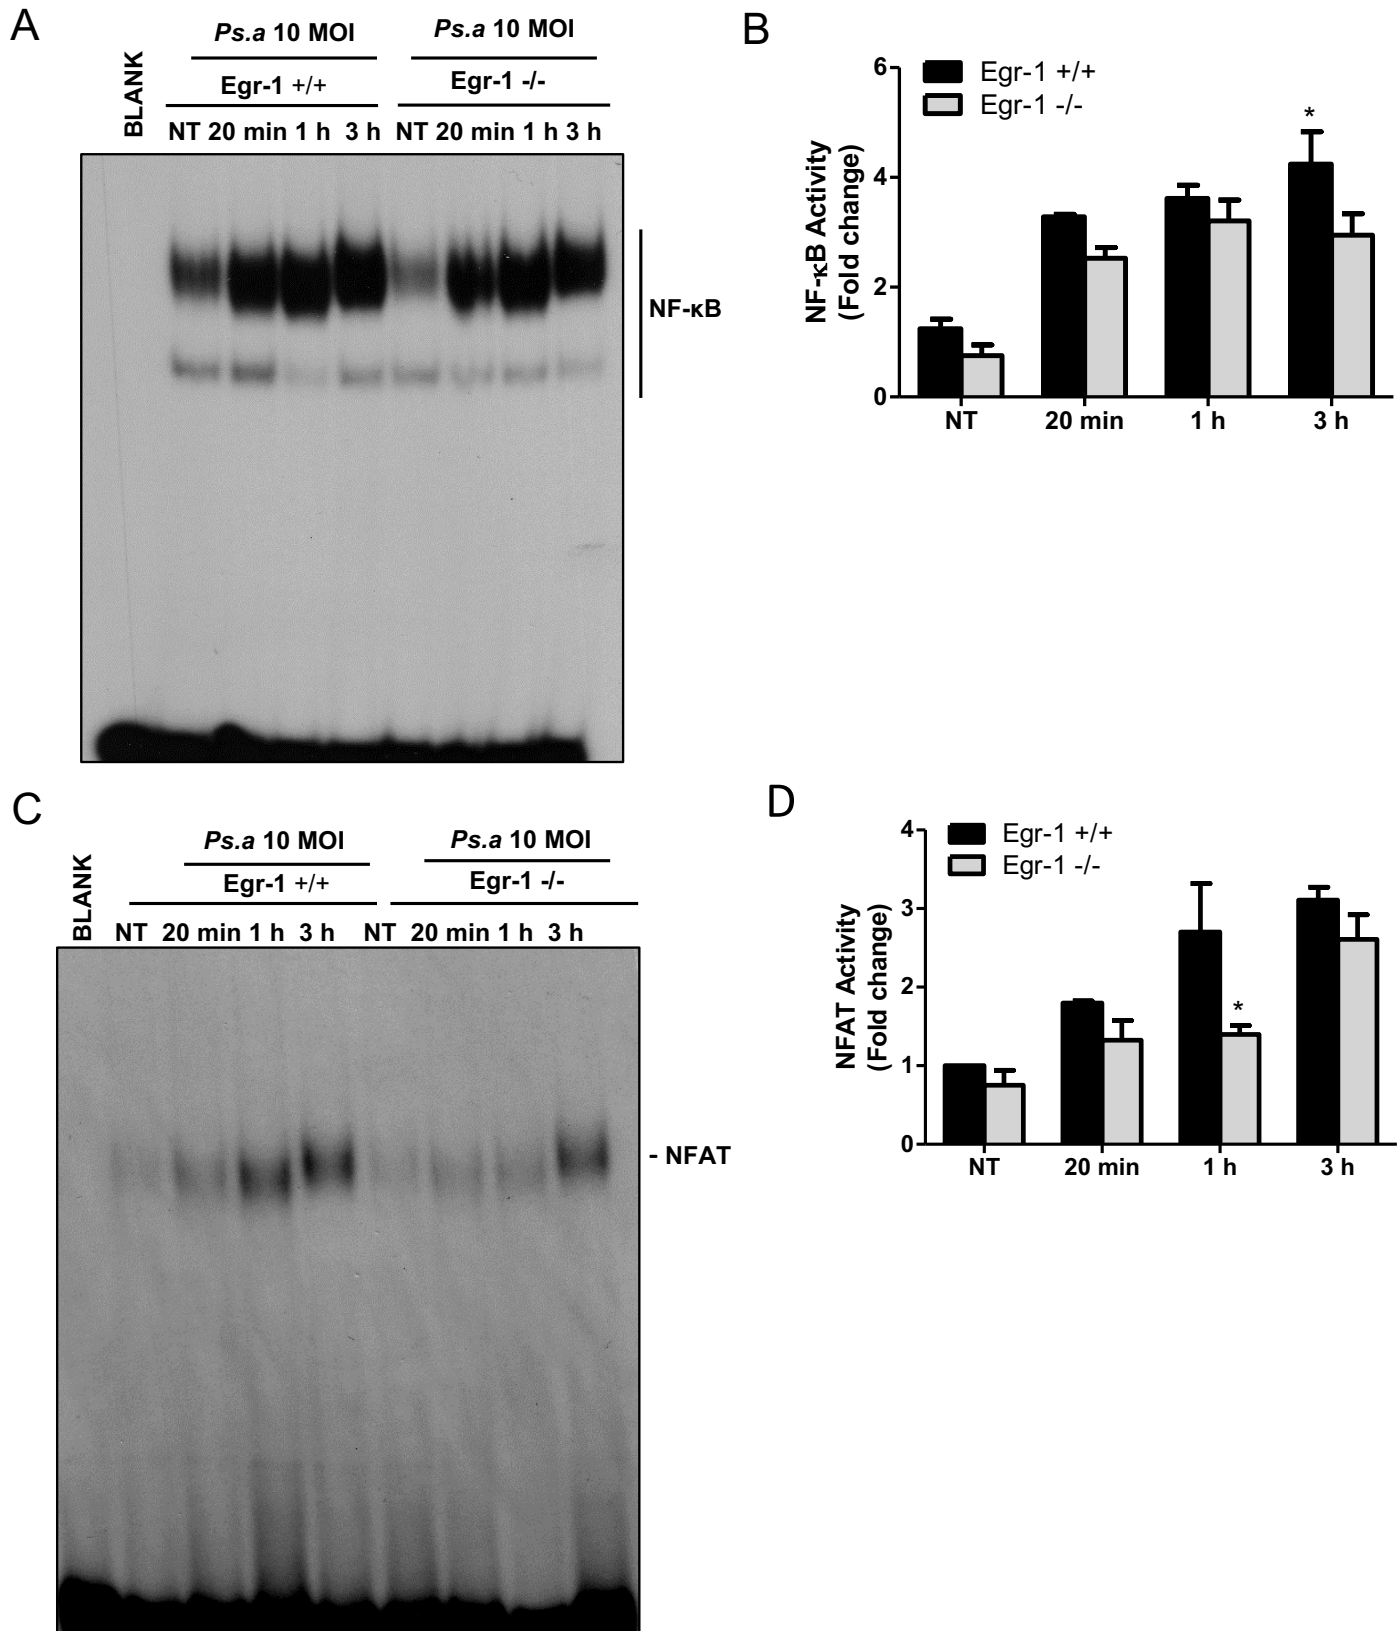

**Fig S5. Egr-1-deficient BMMs display diminished NF-κB and NFAT activation during *P. aeruginosa* infection.** Wild-type (+/+) and Egr-1-deficient (-/-) BMMs were infected with *P. aeruginosa* 8821 at a MOI of 10 for 20 min, 1 h, 3 h or left untreated (NT). Nuclear proteins were extracted and subjected to EMSA by incubation with <sup>32</sup>P-labeled NF-κB (A) and NFAT (C) DNA probes. Data are representative of three individual experiments. Densitometry analysis was performed for NF-κB (B) and NFAT (D) activities, and data are expressed as fold change data versus wild-type untreated BMMs (n = ± 3 SEM, \*p < 0.05).

Fig S6

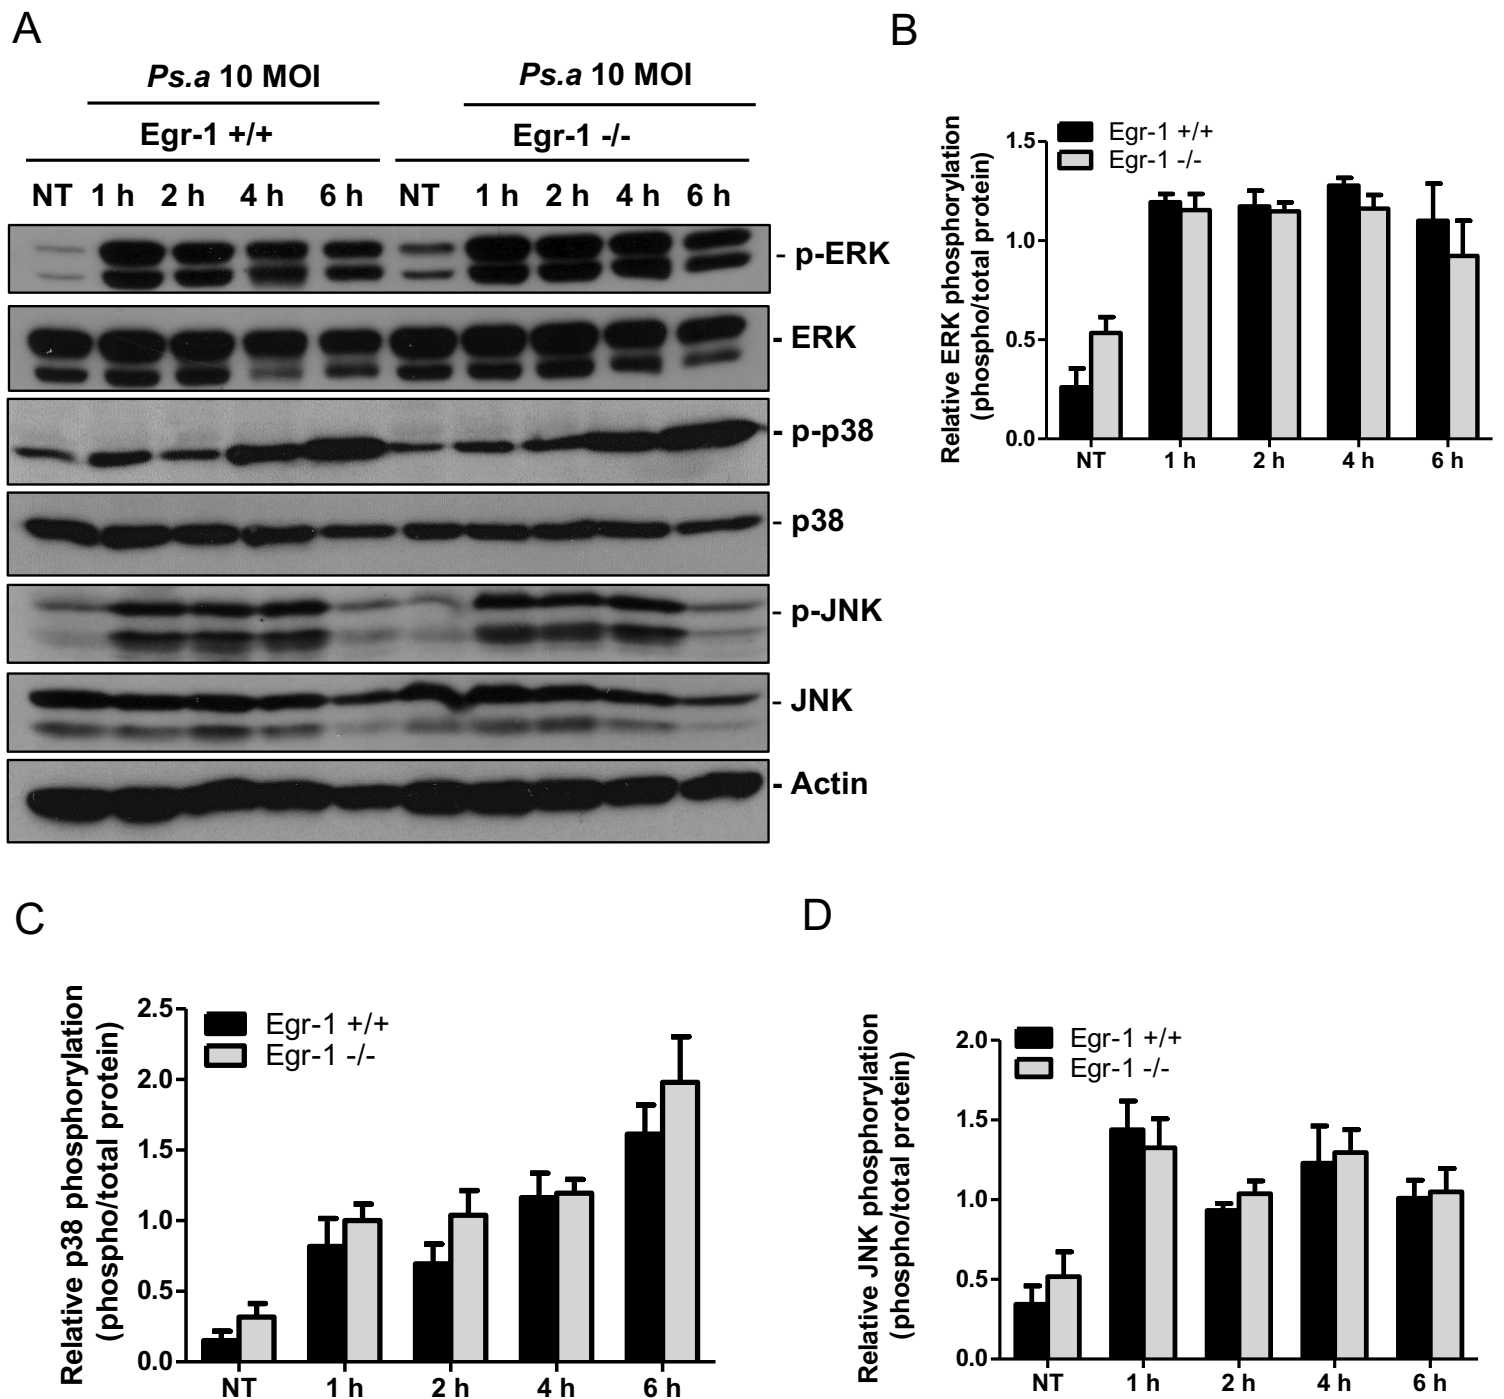

**Fig S6. Egr-1 deficiency has no effect on MAPK activation in macrophages during *P. aeruginosa* infection.** Wild-type (+/+) and Egr-1-deficient (-/-) BMMs were infected with *P. aeruginosa* 8821 at a MOI of 10 for 1 h, 2 h, 4 h, 6 h or left untreated (NT). Cell lysates were subjected to Western blot analysis for determining phospho- and total ERK, p38 and JNK, as well as actin as a loading control. Blots are representative of three independent experiments (A). Densitometry analysis of phosphorylated ERK (B), p38 (C) and JNK (D) was normalized to their total protein respectively ( $n = 3 \pm \text{SEM}$ ).

Fig S7

PAO1-infected neutrophils

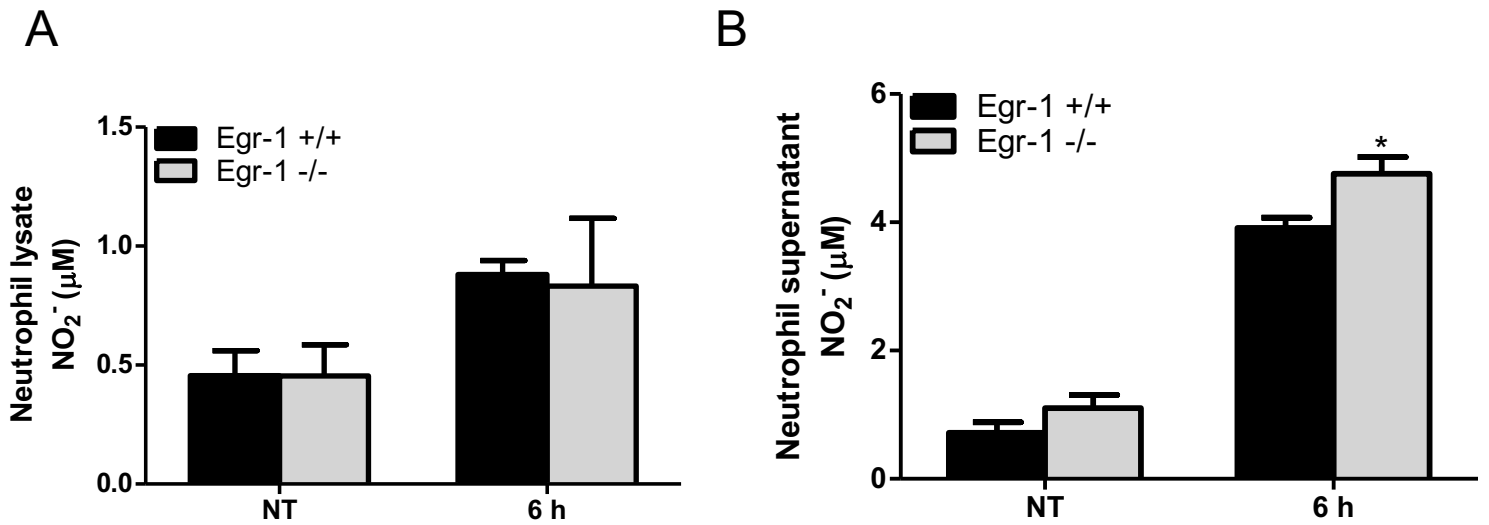

PAO1-infected macrophages

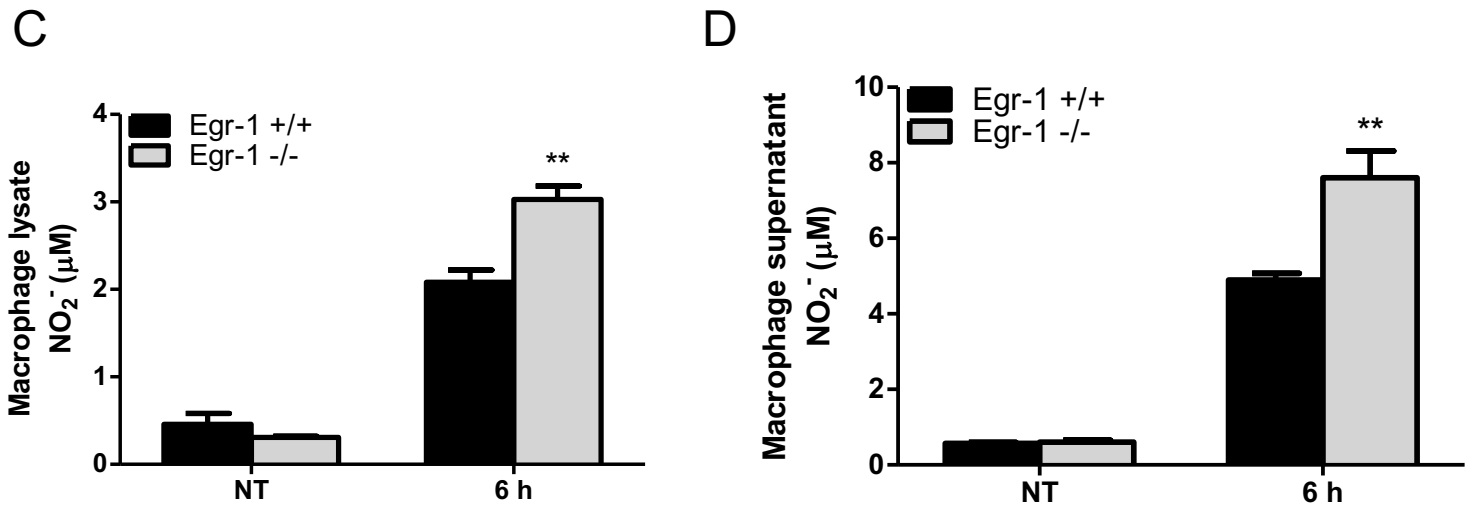

**Fig S7. Egr-1 deficiency leads to increased nitric oxide production in neutrophils and macrophages in response to *P. aeruginosa* PAO1 infection.** Wild-type (+/+) and Egr-1-deficient (-/-) neutrophils and BMMs were infected with *P. aeruginosa* PAO1 for 6 h or left untreated (NT). The  $\text{NO}_2^-$  levels were tested in cell lysates (A, C) and supernatants (B, D) at 6 h ( $n = 3 \pm \text{SEM}$ , \* $p < 0.05$ , \*\* $p < 0.01$ ).

Fig S8

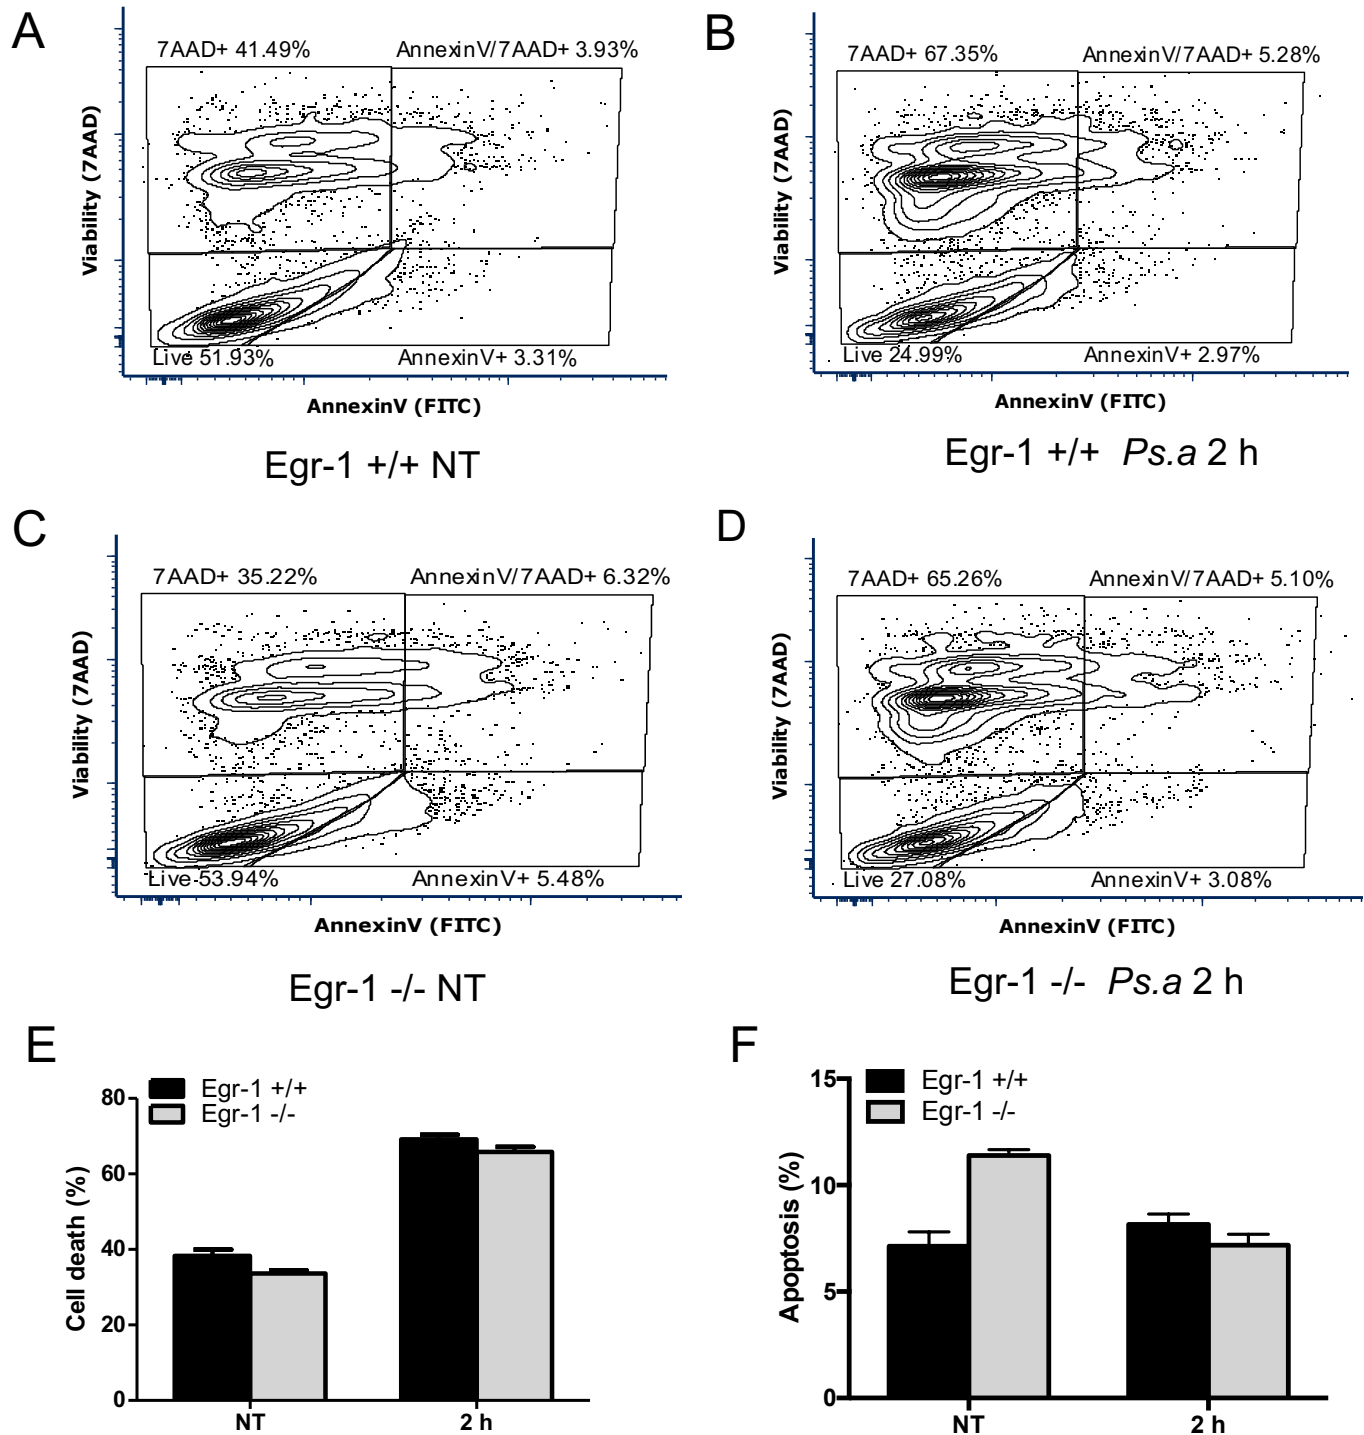

**Fig S8. Egr-1 deficiency has no impact on macrophage apoptosis during *P. aeruginosa* infection.** Wild-type (+/+) and Egr-1-deficient (-/-) BMMs were infected with *P. aeruginosa* 8821 at a MOI of 10 for 2 h or left untreated (NT). The cells were stained with FITC Annexin V and 7-AAD, and a total  $2 \times 10^4$  cells from each sample was analyzed on a flow cytometer. The density plots for wild-type (A and B) and Egr-1-deficient (C and D) macrophages were represented of three individual experiments. The bar graphs for the data of cell death (E) and apoptosis (F) were presented as percentage (n = 3).
